# Supplementary material
Source: PubMed Central journal article supplement (PMC9315947)
Supplement: jamainternmed-e222684-s001.pdf [file jamainternmed-e222684-s001.pdf]

## Supplemental Online Content

Dawood NB, Shu ML, Tseng C-H, et al. An electronic medical record–based decision support tool for the diagnosis of primary hyperparathyroidism. *JAMA Intern Med*. Published online July 25, 2022. doi:10.1001/jamainternmed.2022.2684

**eTable 1.** CPT/ICD-9 Codes for Nonparathyroid Causes of Hypercalcemia

**eTable 2.** CPT Codes for Calcium-Rich Metal Implantation in Orthopedic Surgery Patients

**eTable 3.** ICD9 and ICD10 Codes for Clinical Sequelae of Primary Hyperparathyroidism

**eFigure.** EMR-Based Tool Prompting PTH Assessment in Patients with Hypercalcemia

**eMethods.** Subjects and Methods (Expanded)

This supplemental material has been provided by the authors to give readers additional information about their work.

## Online-Only Material

**eTable 1. CPT/ICD-9 Codes for Nonparathyroid Causes of Hypercalcemia**

| CPT Code     | Description                                    |
|--------------|------------------------------------------------|
| 179378       | HYPERCALCEMIA ASSOCIATED WITH CHRONIC DIALYSIS |
| 179376       | HYPERCALCEMIA DUE TO A DRUG                    |
| 179372       | HYPERCALCEMIA DUE TO GRANULOMATOUS DISEASE     |
| 179374       | HYPERCALCEMIA DUE TO HYPERTHYROIDISM           |
| 179375       | HYPERCALCEMIA DUE TO IMMOBILIZATION            |
| 295851       | HYPERCALCEMIA DUE TO LITHIUM                   |
| 179373       | HYPERCALCEMIA DUE TO SARCOIDOSIS               |
| 179377       | HYPERCALCEMIA DUE TO THIAZIDE AND VITAMIN A    |
| 371448       | HYPERCALCEMIA OF MALIGNANCY                    |
| 736778       | HISTORY OF MALIGNANCY ASSOCIATED HYPERCALCEMIA |
| 179382       | MAHC (MALIGNANCY ASSOCIATED HYPERCALCEMIA)     |
| 179383       | MALIGNANCY ASSOCIATED HYPERCALCEMIA            |
| ICD-9 728.88 | RHABDOMYOLYSIS                                 |

**eTable 2. CPT Codes for Calcium-Rich Metal Implantation in Orthopedic Surgery Patients**

| CPT Code | Description                                                    |
|----------|----------------------------------------------------------------|
| 27487    | REVISE KNEE JOINT REPLACE, ALL PARTS                           |
| 27134    | REVISE TOTAL HIP REPLACEMENT                                   |
| 11011    | DEBRIDE ASSOCIATED OPEN FRACTURE/DISLOCATION SKIN/MUSCLE       |
| 11010    | DEBRIDE ASSOCIATED OPEN FRACTURE/DISLOCATION SKIN/SUBCUTANEOUS |

**eTable 3. ICD9 and ICD10 Codes for Clinical Sequelae of Primary Hyperparathyroidism**

| ICD-9/ICD-10 Codes                                       | Description                      |
|----------------------------------------------------------|----------------------------------|
| ICD-10: S72<br>ICD-9: 820, 821                           | FEMUR FRACTURE                   |
| ICD-10: S12                                              | CERVICAL FRACTURE                |
| ICD-10: S32                                              | LUMBOSACRAL FRACTURE             |
| ICD-10: S22.0                                            | THORACIC FRACTURE                |
| ICD-9: 805, 806                                          | SPINAL FRACTURE                  |
| ICD-10: N20<br>ICD-9: 592.0                              | NEPHROLITHIASIS/NEPHROCALCINOSIS |
| ICD-10: M85.8, M80, M81.0<br>ICD-9: 733.9, 733.00, 268.2 | OSTEOPENIA/OSTEOPOROSIS          |
| ICD-10: E21.3<br>ICD-9: 252.0                            | HYPERPARATHYROIDISM              |

**eFigure. EMR-Based Tool Prompting PTH Assessment in Patients with Hypercalcemia**

Care Guidance (1) ⌵

⚠ Based on patient's established hypercalcemia, consider if patient has primary hyperparathyroidism and order a PTH test. [Provide Feedback about this BPA](#)

[Click here for more information from the UCLA Endocrine Center](#)

| Calcium    |          |                  |        |
|------------|----------|------------------|--------|
| Date       | Value    | Ref Range        | Status |
| 07/25/2014 | 11.6 (H) | 8.6 - 10.2 mg/dL | Final  |
| 10/11/2013 | 10.7 (H) | 8.7 - 10.5 mg/dL | Final  |
| 03/08/2010 | 10.5     | 8.7 - 10.5 mg/dL |        |
| 07/17/2009 | 10.8 (H) | 8.7 - 10.5 mg/dL |        |

| Calcium, Serum (Labcorp) |          |                  |        |
|--------------------------|----------|------------------|--------|
| Date                     | Value    | Ref Range        | Status |
| 02/21/2020               | 10.6 (H) | 8.7 - 10.3 mg/dL | Final  |
| 11/20/2019               | 11.0 (H) | 8.7 - 10.3 mg/dL | Final  |

Comment:  
\*\*Verified by repeat analysis\*\*

Order Do Not Order

🏠 PTH, Intact

Order Do Not Order

🏠 PTH, Intact & Calcium

Acknowledge Reason

Defer to another provider
Not appropriate for this patient
Other

✓ Accept

## eMethods. Subjects and Methods (Expanded)

**Tool Design:** The tool was developed as a “Best Practices Advisory” within the Epic Systems Software. It appears as a pop-up notification in the orders tab of the patient chart. The algorithm is designed to detect abnormal calcium values in the two years prior to implementation and firing. The display includes both normal and abnormal historical calcium levels for reference; normal values do not prompt firing of the alert. Physicians in the departments of primary care, endocrinology, orthopedic surgery, and endocrine surgery were given the following options to address the alert: (1) order PTH alone or PTH with calcium, (2) defer to another provider (alert reappears in next encounter), (3) dismiss alert (temporarily cancels alert), or (4) deem the alert inappropriate for this patient (prompts free text response).

**Exclusion Criteria:** The exclusion criteria were an estimated glomerular filtration rate (eGFR) <30 mL/min/1.73 m<sup>3</sup> [0.5mL/s/m<sup>2</sup>] or a history of ≥1 serum level monitoring the use of an immunosuppressant (sirolimus, tacrolimus, everolimus, mycophenolic acid, and cyclosporine), to exclude those with secondary and tertiary hyperparathyroidism due to renal transplantation, respectively. Patients with secondary hyperparathyroidism attributable to vitamin D deficiency (serum 25-OHD <30 ng/mL [74.9 nmol/L]) were excluded as well. Also excluded were patients with recorded diagnoses of non-parathyroid causes of hypercalcemia and elevated calcium levels caused by calcium-rich metal implantation during recent orthopedic surgery (Appendix A&B).

**Baseline Period:** During a silent run-in period from March 2020 to May 2020, the alert was active but invisible to users, which enabled the acquisition of baseline data. Patients in the silent run-in period were followed until September 2020, resulting in a median follow-up of 5 months. While they did not

undergo PTH work-up during this silent period, they still met criteria to re-trigger the alert during the active implementation period. Patients from the silent period were included in the intervention group if they underwent PTH work-up following alert activity during the implementation phase of the study.

*Statistical Methods:* We used Fisher's exact test to compare categorical variables, and the Wilcoxon rank-sum test to compare continuous variables between patients with and without PTH measurement. All tests were two-sided and all analyses performed in R-3.6.2 ([www.r-project.org](http://www.r-project.org)).
